# Supplementary material for: Development and Validation of a Loop-Mediated Isothermal Amplification Diagnostic Method to Detect the Quarantine Potato Pale Cyst Nematode, Globodera pallida
Source: MDPI journal article supplement (doi:10.3390/pathogens10060744), 2021-06-12
Supplement: s1 [file s1]

## Supplementary Materials

**Table S1.** Geographical origin, accession reference number and year of collection of sequences from *Globodera* species used in either *in silico* or in the laboratory evaluation to verify the specificity of the primers.

| <i>Globodera</i> Species       | GenBank Accession Number | Origin                  | Collection Code/Year  |      |
|--------------------------------|--------------------------|-------------------------|-----------------------|------|
| <i>Globodera rostochiensis</i> | EU855120                 | Poland                  | *                     | 2008 |
|                                | MK791260                 | Coimbra                 | 650P                  | 2014 |
|                                | MK791261                 | Montalegre              | 5244                  | 2015 |
|                                | MK791262                 | Montalegre              | 5245                  | 2015 |
|                                | MK791263                 | Viseu                   | 9996                  | 2018 |
|                                | MK791264                 | Mirandela               | 14598                 | 2018 |
|                                | MK791265                 | Mirandela               | 14600                 | 2018 |
|                                | MK791266                 | Bragança                | 14601                 | 2018 |
|                                | MN493786                 | Montalegre              | 13486                 | 2017 |
|                                | MN493787                 | Chaves                  | 8850                  | 2016 |
|                                | MN493788                 | Viseu                   | 9610                  | 2017 |
|                                | MN493789                 | Viseu                   | 5967                  | 2016 |
|                                | MN493790                 | Viseu                   | 7047                  | 2017 |
|                                | MN493791                 | Odemira                 | 3663                  | 2018 |
|                                | MN493792                 | Aveiro                  | 7913                  | 2018 |
|                                | MT251880                 | Coimbra                 | 1252                  | 2019 |
|                                | MT251881                 | Montalegre              | 1681-2                | 2019 |
|                                | MT251882                 | Montalegre              | 1681-6                | 2019 |
|                                | MT251883                 | Chaves                  | 1681-7                | 2019 |
|                                | MT251884                 | Mirandela               | 1681-10               | 2019 |
|                                | MT251885                 | Melgaço                 | 1249-1                | 2019 |
|                                | MH820358                 | Australia               | Aust02                | 2018 |
|                                | MH820359                 | Australia               | Aust03                | 2018 |
|                                | MH820360                 | Australia               | Aust14                | 2018 |
|                                | MH820361                 | Australia               | Aust21                | 2018 |
|                                | LC030412                 | Japan:Hokkaido, Kutchan | Kutchan-1 clone: No.2 | 2018 |
|                                | LC030413                 | Japan:Hokkaido, Kutchan | Kutchan-1 clone: No.3 | 2018 |
|                                | LT159836                 | Algeria                 | 31_72Gr               | 2017 |
|                                | KP283532                 | Kenya: Central region   | KEN_001               | 2015 |
|                                | KP283533                 | Kenya: Central region   | KEN_002               | 2015 |
|                                | KP283534                 | Kenya: Central region   | KEN_003               | 2015 |
|                                | KJ409617                 | Russia                  | GRRUS1                | 2014 |
|                                | KR057953                 | Belgrade                | Belgrade              | 2014 |
|                                | KC508108                 | Tomanj, Serbia          | Tomanj                | 2010 |
|                                | KC508109                 | Tomanj, Serbia          | Tomanj                | 2010 |
|                                | KC508110                 | Teocin, Serbia          | Teocin                | 2010 |
|                                | KC508111                 | Gojna Gora, Serbia      | Gojna Gora            | 2008 |
|                                | KJ409612                 | Slovakia                | GRSVK1                | 2014 |
|                                | KJ409614                 | Slovakia                | GRSVK2                | 2014 |
|                                | KJ409616                 | Slovakia                | GRSVK4                | 2014 |
| <i>Globodera</i>               | FJ667946                 | *                       | N-087                 | 2009 |

|                              |          |                     |                           |      |
|------------------------------|----------|---------------------|---------------------------|------|
| <i>tabacum</i>               | MN508956 | Netherlands         | NL:c6876                  | 2018 |
|                              | GQ294525 | USA: Connecticut    | 119-1-110                 | 2011 |
| <i>Globodera pallida</i>     | LC096097 | Japan               | kita                      | 2015 |
|                              | AF016866 | Peru                | Peru<br>(Bolivian border) | 1998 |
|                              | EU006704 | Huancabamba, Peru   | huancabamba               | 2008 |
|                              | EU006705 | Amantani, Peru      | amantani                  | 2008 |
|                              | AF016867 | Tiabaya, Peru       | Tiabaya, Peru             | 1998 |
|                              | EU006706 | Cusco, Peru         | cusco                     | 2008 |
|                              | DQ097514 | Argentina           | *                         | 2006 |
|                              | EF153834 | Chile               | *                         | 2007 |
|                              | EF622533 | New Zealand         | Gp-NZ                     | 2008 |
|                              | EF153836 | USA: Idaho          | *                         | 2020 |
|                              | AF016869 | Northern Ireland    | Northern Ireland          | 2008 |
|                              | DQ847110 | UK: Risby           | clone = 2-Cb              | 2006 |
|                              | EF153838 | UK: York            | *                         | 2020 |
|                              | DQ847109 | UK: Risby           | clone 1-Bb                | 2006 |
|                              | AF016871 | Spain               | Spain                     | 1998 |
|                              | AJ606687 | Ukraine:Uzhhorod    | *                         | 2004 |
|                              | AF016870 | Romania             | Romania                   | 1998 |
|                              | MN475961 | Viseu               | 3876                      | 2014 |
|                              | MN475962 | S. Magos            | 4261                      | 2016 |
|                              | MN475963 | S. Magos            | 15731                     | 2018 |
|                              | MN475964 | Vagos               | 9993                      | 2018 |
|                              | MN475965 | Montalegre          | 14002                     | 2017 |
|                              | MN475966 | Esposende           | 5087                      | 2016 |
|                              | MK791517 | Penafiel            | 4694                      | 2015 |
|                              | MK791518 | Viseu               | 5961                      | 2016 |
|                              | MK791519 | Guimarães           | 11309                     | 2018 |
|                              | MK791520 | Mirandela           | 14593                     | 2018 |
|                              | MK791521 | Mirandela           | 14599                     | 2018 |
|                              | MT251890 | Vagos               | 1223-7                    | 2019 |
|                              | MT251891 | Aveiro              | 1223-8                    | 2019 |
|                              | MT251892 | Mira                | 1086-3                    | 2019 |
| <i>Globodera n. sp.</i>      | AY090883 | Bouro, Portugal     | Bouro                     | 1997 |
|                              | AY090882 | Canha, Portugal     | Canha                     | 1997 |
|                              | AY090884 | Ladoeiro, Portugal  | Ladoeiro                  | 1997 |
|                              | MN512244 | Montijo, Portugal   | 12031                     | 2018 |
|                              | MT256387 | Lagameças, Portugal | 1479-2                    | 2019 |
| <i>Globodera mexicana</i>    | EU006709 | Peru                | strain tlaxcala           | 2008 |
|                              | HQ260406 | Mexico              | CD514                     | 2011 |
|                              | MN116522 | Mexico              | CD1891b                   | 2019 |
|                              | MN258873 | Mexico              | CD2792a                   | 2019 |
|                              | MN258874 | Mexico              | CD2792b                   | 2019 |
| <i>Globodera ellingtonae</i> | GQ896544 | Oregon              | 1813                      | 2011 |
|                              | GQ896547 | Idaho               | 347                       | 2011 |
|                              | JF739916 | Oregon              | 1838                      | 2012 |
|                              | JF739928 | Oregon              | 1804                      | 2012 |
|                              | JF739934 | Oregon              | 1812                      | 2012 |

\* Data not available.

**Table S2.** Results of protocols for *Globodera pallida* LAMP optimization assays.

| Protocol       | Master Mix<br>(15 µL) | Primer Volume (µL)               |                                 | Amplification<br>Temp (°C),<br>Time (min)                        | T <sub>Melting</sub><br>Heat-<br>Cooling<br>(°C) | Set of<br>Primers | Results: Amplification Time (s)                                                                                                                                                          | Melting Temperatude (°C)                                                                                                                                                           |
|----------------|-----------------------|----------------------------------|---------------------------------|------------------------------------------------------------------|--------------------------------------------------|-------------------|------------------------------------------------------------------------------------------------------------------------------------------------------------------------------------------|------------------------------------------------------------------------------------------------------------------------------------------------------------------------------------|
|                |                       | F3, B3<br>(I.<br>Conc.<br>50 µM) | FIP, BIP<br>(I. Conc.<br>50 µM) |                                                                  |                                                  |                   |                                                                                                                                                                                          |                                                                                                                                                                                    |
| A              | ISO-004               | 0.10                             | 0.80                            | 60, 60                                                           | 95 - 75                                          | Set 1             | <i>G. pallida</i> = 16:25; 15:50<br><i>G. tabacum</i> = 09:56; 10:04<br><i>G. rostochiensis</i> = 13:44; 13:07<br><i>Globodera n. sp.</i> = n/a; n/a<br><i>Heterodera sp.</i> = n/a; n/a | <i>G. pallida</i> = 91.2; 91.6<br><i>G. tabacum</i> = 91.3; 91.9<br><i>G. rostochiensis</i> = 91.3; 91.7<br><i>Globodera n. sp.</i> = n/a; n/a<br><i>Heterodera sp.</i> = n/a; n/a |
| B              |                       |                                  | 0.60                            | 65, 20                                                           |                                                  |                   | <i>G. pallida</i> = n/a; n/a<br><i>G. tabacum</i> = n/a; 05:49                                                                                                                           | <i>G. pallida</i> = n/a; n/a<br><i>G. tabacum</i> = n/a; n/a                                                                                                                       |
| C <sub>1</sub> |                       | 0.15                             | 0.80                            |                                                                  |                                                  |                   | <i>G. pallida</i> = 18:47; n/a<br><i>G. tabacum</i> = 18:39; 18:50                                                                                                                       | <i>G. pallida</i> = 90.6; n/a<br><i>G. tabacum</i> = 91.2; 91.2                                                                                                                    |
| C <sub>2</sub> |                       |                                  |                                 |                                                                  |                                                  | Set 2a            | <i>G. pallida</i> = 17:37; 16:53<br><i>G. tabacum</i> = n/a; n/a                                                                                                                         | <i>G. pallida</i> = 89.8; 90.1<br><i>G. tabacum</i> = n/a; n/a                                                                                                                     |
| D              |                       |                                  | Set 1                           | <i>G. pallida</i> = n/a; 19:16<br><i>G. tabacum</i> = n/a; n/a   |                                                  |                   | <i>G. pallida</i> = n/a; n/a<br><i>G. tabacum</i> = n/a; n/a                                                                                                                             |                                                                                                                                                                                    |
| E              |                       |                                  |                                 | <i>G. pallida</i> = n/a; 19:24<br><i>G. tabacum</i> = n/a; 19:19 |                                                  |                   | <i>G. pallida</i> = n/a; 90.8<br><i>G. tabacum</i> = n/a; 90.6                                                                                                                           |                                                                                                                                                                                    |
| F              |                       |                                  | 0.80                            | 64, 20                                                           |                                                  | Set 2a            | <i>G. pallida</i> = n/a; n/a; n/a<br><i>G. pallida</i> = n/a; 15:07; 16:00                                                                                                               | <i>G. pallida</i> = 89.2; 89.3; 89.2<br><i>G. pallida</i> = 89.5; 88.8; 90.2                                                                                                       |

|                |         |      |      |                               |  |  |                                                                                                                                       |                                                                                                                                              |                                                                                                                                      |
|----------------|---------|------|------|-------------------------------|--|--|---------------------------------------------------------------------------------------------------------------------------------------|----------------------------------------------------------------------------------------------------------------------------------------------|--------------------------------------------------------------------------------------------------------------------------------------|
| G              |         | 0.12 |      | 66, 20                        |  |  | <i>G. pallida</i> = 15:30; n/a<br><i>G. pallida</i> = n/a; n/a<br><i>G. tabacum</i> = n/a; n/a; n/a; n/a                              | <i>G. pallida</i> = 90.3; n/a<br><i>G. pallida</i> = n/a; n/a<br><i>G. tabacum</i> = 90.0; n/a; n/a; n/a                                     |                                                                                                                                      |
| H              |         | 0.15 | 0.90 | 64, 20                        |  |  | <i>G. pallida</i> = 19:06; 18:07<br><i>G. pallida</i> = 17:19; 15:57                                                                  | <i>G. pallida</i> = 89.4; 88.9<br><i>G. pallida</i> = 89.4; 90.0                                                                             |                                                                                                                                      |
| I              |         | 0.12 |      |                               |  |  | <i>G. pallida</i> = 19:28; 19:06<br><i>G. pallida</i> = 17:51; 18:39                                                                  | <i>G. pallida</i> = 89.2; 88.7<br><i>G. pallida</i> = 89.2; 89.7                                                                             |                                                                                                                                      |
| J              | ISO-001 | 0.15 | 0.80 | 64, 30                        |  |  | <i>G. pallida</i> = 27:20; 28:06<br><i>G. pallida</i> = 26:00; 26:53<br><i>G. tabacum</i> = 29:16; n/a<br><i>Heterodera</i> = n/a     | <i>G. pallida</i> = 89.1; 89.2<br><i>G. pallida</i> = 89.1; 88.9<br><i>G. tabacum</i> = n/a; n/a<br><i>Heterodera</i> = n/a                  |                                                                                                                                      |
| K <sub>1</sub> |         |      |      |                               |  |  | <i>G. pallida</i> = 29:33; 27:08<br><i>G. pallida</i> = 30:08; 28:53<br><i>G. tabacum</i> = 57:05; 50:00<br><i>G. tabacum</i> = 31:09 | <i>G. pallida</i> = 90.3; 90.4<br><i>G. pallida</i> = 90.4; 90.0<br><i>G. tabacum</i> = 90.1; 90.7<br><i>G. tabacum</i> = 88.6               |                                                                                                                                      |
| K <sub>2</sub> |         |      |      | Set 2a +<br>MgCl <sub>2</sub> |  |  | <i>G. pallida</i> = 18:02; 19:01<br><i>G. tabacum</i> = 19:34; 18:56<br><i>G. rostochiensis</i> = n/a                                 | <i>G. pallida</i> = 89.6; 89.6<br><i>G. tabacum</i> = n/a; n/a<br><i>G. rostochiensis</i> = n/a                                              |                                                                                                                                      |
| L <sub>1</sub> |         |      |      | 95 -                          |  |  | Set 2a                                                                                                                                | <i>G. pallida</i> = 23:37; 22:13<br><i>G. pallida</i> = 25:33; 22:14<br><i>G. pallida</i> = 23:47; 31:05<br><i>G. pallida</i> = 24:46; 27:34 | <i>G. pallida</i> = 89.3; 89.4<br><i>G. pallida</i> = 89.8; 89.8<br><i>G. pallida</i> = 89.8; 89.8<br><i>G. pallida</i> = 89.8; 89.8 |
| L <sub>2</sub> |         |      |      |                               |  |  |                                                                                                                                       | <i>G. pallida</i> = 29:30; 36:24<br><i>G. tabacum</i> = n/a<br><i>G. rostochiensis</i> = n/a<br><i>Heterodera</i> = 31:06                    | <i>G. pallida</i> = 91.25; 91.4<br><i>G. tabacum</i> = n/a<br><i>G. rostochiensis</i> = n/a<br><i>Heterodera</i> = n/a               |

|                |         |  |  |        |         |                               |                                                                                                                                                                                                  |                                                                                                                                                                                 |
|----------------|---------|--|--|--------|---------|-------------------------------|--------------------------------------------------------------------------------------------------------------------------------------------------------------------------------------------------|---------------------------------------------------------------------------------------------------------------------------------------------------------------------------------|
| K <sub>2</sub> | ISO-001 |  |  |        |         | Set 2a +<br>MgCl <sub>2</sub> | <i>G. pallida</i> = 18:02; 19:01<br><i>G. tabacum</i> = 19:34; 18:56<br><i>G. rostochiensis</i> = n/a                                                                                            | <i>G. pallida</i> = 89.6; 89.6<br><i>G. tabacum</i> = n/a; n/a<br><i>G. rostochiensis</i> = n/a                                                                                 |
| L <sub>1</sub> |         |  |  |        |         | Set 2a                        | <i>G. pallida</i> = 23:37; 22:13<br><i>G. pallida</i> = 25:33; 22:14<br><i>G. pallida</i> = 23:47; 31:05<br><i>G. pallida</i> = 24:46; 27:34                                                     | <i>G. pallida</i> = 89.3; 89.4<br><i>G. pallida</i> = 89.8; 89.8<br><i>G. pallida</i> = 89.8; 89.8<br><i>G. pallida</i> = 89.8; 89.8                                            |
| L <sub>2</sub> |         |  |  |        |         |                               | <i>G. pallida</i> = 29:30; 36:24<br><i>G. tabacum</i> = n/a<br><i>G. rostochiensis</i> = n/a<br><i>Heterodera</i> = 31:06                                                                        | <i>G. pallida</i> = 91.25; 91.4<br><i>G. tabacum</i> = n/a<br><i>G. rostochiensis</i> = n/a<br><i>Heterodera</i> = n/a                                                          |
| M <sub>1</sub> | ISO-004 |  |  | 64, 20 | 95 - 85 | Set 2a                        | <i>G. pallida</i> = 17:36; 17:47; 17:32<br><i>G. tabacum</i> = 19:52; 19:07<br><i>G. rostochiensis</i> = 18:59<br><i>Globodera n. sp.</i> = 17:55; 18:50<br><i>Heterodera sp.</i> = 19:04; 18:57 | <i>G. pallida</i> = 89.7; 89.6; 89.6<br><i>G. tabacum</i> = n/a; n/a<br><i>G. rostochiensis</i> = n/a<br><i>Globodera n. sp.</i> = n/a; n/a<br><i>Heterodera sp.</i> = n/a; n/a |
| M <sub>2</sub> |         |  |  |        |         |                               | <i>G. pallida</i> = 17:55; 18:31; 18:07<br><i>G. tabacum</i> = 19:11; n/a<br><i>G. rostochiensis</i> = n/a                                                                                       | <i>G. pallida</i> = 90.1; 89.9; 90.1<br><i>G. tabacum</i> = n/a; n/a<br><i>G. rostochiensis</i> = n/a                                                                           |

Orange: unexpected result; Green: expected result after changing protocol; Black: expected result.

**Figure S1. (A) and (B)** LAMP designer tool Primer Explorer V5 (Eiken Chemical Co. LTD, Tokyo, Japan) outcome primers sets.

# A

| Primer Set List                 |            |            |            |           |            |            |            |            |             |             |             |            |            |            |             |             |             |             |            |            |            |            |            |         |            |            |      |      |
|---------------------------------|------------|------------|------------|-----------|------------|------------|------------|------------|-------------|-------------|-------------|------------|------------|------------|-------------|-------------|-------------|-------------|------------|------------|------------|------------|------------|---------|------------|------------|------|------|
| Primer set: sorting rule [None] |            |            |            |           |            |            |            |            |             |             |             |            |            |            |             |             |             |             |            |            |            |            |            |         |            |            |      |      |
| Target DNA                      | CCTCGTTTG  | TTGTGACGG  | ACACATGCC  | GCTATGTTT | G9CTGGCACA | TTGATCAACA | ATGTATGGAC | AGCGCCCTGT | G9GCACATGA  | GTGTTGG9G   | GTAAACGATG  | TTG9TG9CCC | AATG9GTGAC | TGACAGATTG | CTGTTGTGCT  | G9G9TGCGTG  | CACCAACG9A  | G9TG9CAACG  | CCACAG99CA | CCCTAACG9C | TGTC9TG9GC | TCTGTGCGTC | GT         |         |            |            |      |      |
| (Complement)                    | ggagggcaac | aacacatgcc | tgtgtacacg | cgatcacaa | cgaagctgt  | aactatgtgt | tacataacgt | tccggggaca | cccggtgtact | caaacaccca  | cattgtgtac  | aaccacccgg | ttaccacagt | agctgtcaac | gaaacaaagca | gccacagcac  | gtgtgttgcct | ccaacgttgcg | gggtgcacct | gggtattgcg | acaagacacc | agacacagag | caa        |         |            |            |      |      |
| CONSUSUS (*)                    |            |            |            |           |            |            |            |            |             |             |             |            |            |            |             |             |             |             |            |            |            |            |            |         |            |            |      |      |
| Primer ID                       | gD/dimerr1 | 11         | 21         | 31        | 41         | 51         | 61         | 71         | 81          | 91          | 101         | 111        | 121        | 131        | 141         | 151         | 161         | 171         | 181        | 191        | 201        | 211        | 221        |         |            |            |      |      |
| [1]                             | -2.17      | TTG        | TTGTGACGG  | ACACATGCC | GCTATGTTT  | G9CT       | tgt        | tacataacgt | tccgggga    | T           | G9GCACATGA  | GTGTTGG9   |            |            | gctaac      | gaaacaaagca | gc          | tggttgcct   | ccaacgt    | [1]        |            |            |            |         |            |            |      |      |
| [2]                             | -2.27      | G          | TTGTGACGG  | ACACATGCC | GCTATGTTT  | G9CTGG     | gt         | tacataacgt | tccgggga    | T           | G9GCACATGA  | GTGTTGG9   |            |            |             | aaacagca    | gccacagca   | tggttgcct   | ccaacgt    | [2]        |            |            |            |         |            |            |      |      |
| [3]                             | -1.07 [3]  |            | GG         | ACACATGCC | GCTATGTTT  | G9CTGGCACA | TTGA       |            | gggaca      | cccggtgtact | ca          |            |            | GTGAC      | TGACAGATTG  | CTGTTG      |             |             |            |            | t          | gggtattgcg | acaagca    | cgc     | agacacagag | caa        | [3]  |      |
| [4]                             | -1.71 [4]  |            | GG         | ACACATGCC | GCTATGTTT  | G9CTGGCACA | TTGA       |            | gggaca      | cccggtgtact | ca          |            |            | GTGAC      | TGACAGATTG  | CTGTTG      |             |             |            |            | t          | gggtattgcg | acaagca    | cgc     | agacacagag | caa        | [4]  |      |
| [5]                             | -1.71 [5]  |            | GG         | ACACATGCC | GCTATGTTT  | G9CTGGCACA | TTGAT      |            | gggaca      | cccggtgtact | ca          |            |            | GTGAC      | TGACAGATTG  | CTGTTG      |             |             |            |            | t          | gggtattgcg | acaagca    | cgc     | agacacagag | caa        | [5]  |      |
| [6]                             | -1.71 [6]  |            | G          | ACACATGCC | GCTATGTTT  | G9CTGGCACA | TTGA       |            | gggaca      | cccggtgtact | ca          |            |            | GTGAC      | TGACAGATTG  | CTGTTG      |             |             |            |            | t          | gggtattgcg | acaagca    | cgc     | agacacagag | caa        | [6]  |      |
| [7]                             | -1.71 [7]  |            | G          | ACACATGCC | GCTATGTTT  | G9CTGGCACA | TTGAT      |            | gggaca      | cccggtgtact | ca          |            |            | GTGAC      | TGACAGATTG  | CTGTTG      |             |             |            |            | t          | gggtattgcg | acaagca    | cgc     | agacacagag | caa        | [7]  |      |
| [8]                             | -1.71 [8]  |            |            | ACACATGCC | GCTATGTTT  | G9CTGGCACA | TTGAT      |            | gggaca      | cccggtgtact | ca          |            |            | GTGAC      | TGACAGATTG  | CTGTTG      |             |             |            |            | t          | gggtattgcg | acaagca    | cgc     | agacacagag | caa        | [8]  |      |
| [9]                             | -2.32 [9]  |            |            | ACATGCC   | GCTATGTTT  | G          | A          | ATGTATGGAC | AGCGCCCT    |             | t           | caaacaccca | cattgtgtac |            | GTGAC       | TGACAGATTG  | CTGTTG      |             |            |            | t          | gggtattgcg | acaagca    | cgc     | agacacagag | caa        | [9]  |      |
| [10]                            | -2.32 [10] |            |            | ACATGCC   | GCTATGTTT  | G          |            | ATGTATGGAC | AGCGCCCT    |             |             | caaacaccca | cattgtgtac | a          | GTGAC       | TGACAGATTG  | CTGTTG      |             |            |            | t          | gggtattgcg | acaagca    | cgc     | agacacagag | caa        | [10] |      |
| [11]                            | -2.32 [11] |            |            | ACATGCC   | GCTATGTTT  | G          |            | TGTATGGAC  | AGCGCCCT    |             |             | caaacaccca | cattgtgtac | aac        | GTGAC       | TGACAGATTG  | CTGTTG      |             |            |            | t          | gggtattgcg | acaagca    | cgc     | agacacagag | caa        | [11] |      |
| [12]                            | -2.01 [12] |            |            |           | [12]       | TG         | G9CTGGCACA | TTGATC     |             |             | CCCTGT      | G9GCACATGA | GT         |            | gtcac       | aaccacccgg  | ttaccGTGAC  | TGACAGATTG  | CTGTTGT    |            |            |            |            |         |            |            |      |      |
| [13]                            | -2.01 [13] |            |            |           |            |            |            |            |             |             | CCCTGT      | G9GCACATGA | GTG        |            | gtcac       | aaccacccgg  | ttaccGTGAC  | TGACAGATTG  | CTGTTGT    |            |            |            |            |         |            |            |      |      |
| [14]                            | -2.17      | TTG        | TTGTGACGG  | ACACATGCC | GCTATGTTT  | G9CT       | tgt        | tacataacgt | tccgggga    | T           | G9GCACATGA  | GTGTTGG9   |            |            |             |             | gctaac      | gaaacaaagca | gc         | tggttgcct  | ccaacgt    | [14]       |            |         |            |            |      |      |
| [15]                            | -2.27      | G          | TTGTGACGG  | ACACATGCC | GCTATGTTT  | G9CTGG     | gt         | tacataacgt | tccgggga    |             | CATGA       | GTGTTGG9GT | GTAAACG    |            |             |             | aaacagca    | gccacagca   | tggttgcct  | ccaacgt    | [15]       |            |            |         |            |            |      |      |
| [16]                            | -2.09 [16] |            | GG         | ACACATGCC | GCTATGTTT  | G9CTGGCACA | TTGA       |            | gggaca      | cccggtgtact | ca          |            |            | GTGAC      | TGACAGATTG  | CTGTTGT     |             |             |            |            | t          | gggtattgcg | acaagca    | cgc     | agacacagag | caa        | [16] |      |
| [17]                            | -2.09 [17] |            | GG         | ACACATGCC | GCTATGTTT  | G9CTGGCACA | TTGA       |            | gggaca      | cccggtgtact | ca          |            |            | GTGAC      | TGACAGATTG  | CTGTTGT     |             |             |            |            | t          | gggtattgcg | acaagca    | cgc     | agacacagag | caa        | [17] |      |
| [18]                            | -2.09 [18] |            | GG         | ACACATGCC | GCTATGTTT  | G9CTGGCACA | TTGAT      |            | gggaca      | cccggtgtact | ca          |            |            | GTGAC      | TGACAGATTG  | CTGTTGT     |             |             |            |            | t          | gggtattgcg | acaagca    | cgc     | agacacagag | caa        | [18] |      |
| [19]                            | -1.71 [19] |            | G          | ACACATGCC | GCTATGTTT  | G9CTGGCACA | TTGA       |            | gggaca      | cccggtgtact | ca          |            |            | GTGAC      | TGACAGATTG  | CTGTTGT     |             |             |            |            | t          | gggtattgcg | acaagca    | cgc     | agacacagag | caa        | [19] |      |
| [20]                            | -1.71 [20] |            | G          | ACACATGCC | GCTATGTTT  | G9CTGGCACA | TTGAT      |            | gggaca      | cccggtgtact | ca          |            |            | GTGAC      | TGACAGATTG  | CTGTTGT     |             |             |            |            | t          | gggtattgcg | acaagca    | cgc     | agacacagag | caa        | [20] |      |
| [21]                            | -1.71 [21] |            |            | ACACATGCC | GCTATGTTT  | G9CTGGCACA | TTGAT      |            | gggaca      | cccggtgtact | ca          |            |            | GTGAC      | TGACAGATTG  | CTGTTGT     |             |             |            |            | t          | gggtattgcg | acaagca    | cgc     | agacacagag | caa        | [21] |      |
| [22]                            | -2.32 [22] |            |            | ACATGCC   | GCTATGTTT  | G          | A          | ATGTATGGAC | AGCGCCCT    |             | t           | caaacaccca | cattgtgtac |            | GTGAC       | TGACAGATTG  | CTGTTGT     |             |            |            | t          | gggtattgcg | acaagca    | cgc     | agacacagag | caa        | [22] |      |
| [23]                            | -2.32 [23] |            |            | ACATGCC   | GCTATGTTT  | G          |            | ATGTATGGAC | AGCGCCCT    |             |             | caaacaccca | cattgtgtac | a          | GTGAC       | TGACAGATTG  | CTGTTGT     |             |            |            | t          | gggtattgcg | acaagca    | cgc     | agacacagag | caa        | [23] |      |
| [24]                            | -2.32 [24] |            |            | ACATGCC   | GCTATGTTT  | G          |            | TGTATGGAC  | AGCGCCCT    |             |             | caaacaccca | cattgtgtac | aac        | GTGAC       | TGACAGATTG  | CTGTTGT     |             |            |            | t          | gggtattgcg | acaagca    | cgc     | agacacagag | caa        | [24] |      |
| [25]                            | -2.01 [25] |            |            |           | [25]       | TG         | G9CTGGCACA | TTGATC     |             |             | CCCTGT      | G9GCACATGA | GT         |            | gtcac       | aaccacccgg  | ttacc       | TGAC        | TGACAGATTG | CTGTTGT    |            |            |            |         |            |            |      |      |
| [26]                            | -2.01 [26] |            |            |           |            |            |            |            |             |             | CCCTGT      | G9GCACATGA | GTG        |            | gtcac       | aaccacccgg  | ttacc       | TGAC        | TGACAGATTG | CTGTTGT    |            |            |            |         |            |            |      |      |
| [27]                            | -1.71      | TTG        | TTGTGACGG  | ACACATGCC | GCTATGTTT  | G9CT       | tgt        | tacataacgt | tccgggga    |             | CATGA       | GTGTTGG9GT | GTAAAC     |            |             |             | gctaac      | gaaacaaagca | gc         | tggttgcct  | ccaacgt    | [27]       |            |         |            |            |      |      |
| [28]                            | -2.27      | TG         | TTGTGACGG  | ACACATGCC | GCTATGTTT  | G9CTGG     | gt         | tacataacgt | tccgggga    | T           | G9GCACATGA  | GTGTTGG9   |            |            |             |             | aaacagca    | gccacagca   | tggttgcct  | ccaacgt    | [28]       |            |            |         |            |            |      |      |
| [29]                            | -1.07 [29] |            | GG         | ACACATGCC | GCTATGTTT  | G9CTGGCACA | TTGA       |            | gggaca      | cccggtgtact | ca          |            |            | TGAC       | TGACAGATTG  | CTGTTGT     |             |             |            |            | t          | gggtattgcg | acaagca    | cgc     | agacacagag | caa        | [29] |      |
| [30]                            | -1.71 [30] |            | GG         | ACACATGCC | GCTATGTTT  | G9CTGGCACA | TTGA       |            | gggaca      | cccggtgtact | ca          |            |            | TGAC       | TGACAGATTG  | CTGTTGT     |             |             |            |            | t          | gggtattgcg | acaagca    | cgc     | agacacagag | caa        | [30] |      |
| [31]                            | -1.71 [31] |            | GG         | ACACATGCC | GCTATGTTT  | G9CTGGCACA | TTGAT      |            | gggaca      | cccggtgtact | ca          |            |            | TGAC       | TGACAGATTG  | CTGTTGT     |             |             |            |            | t          | gggtattgcg | acaagca    | cgc     | agacacagag | caa        | [31] |      |
| [32]                            | -1.71 [32] |            | G          | ACACATGCC | GCTATGTTT  | G9CTGGCACA | TTGA       |            | gggaca      | cccggtgtact | ca          |            |            | TGAC       | TGACAGATTG  | CTGTTGT     |             |             |            |            | t          | gggtattgcg | acaagca    | cgc     | agacacagag | caa        | [32] |      |
| [33]                            | -1.71 [33] |            | G          | ACACATGCC | GCTATGTTT  | G9CTGGCACA | TTGAT      |            | gggaca      | cccggtgtact | ca          |            |            | TGAC       | TGACAGATTG  | CTGTTGT     |             |             |            |            | t          | gggtattgcg | acaagca    | cgc     | agacacagag | caa        | [33] |      |
| [34]                            | -1.71 [34] |            |            | ACACATGCC | GCTATGTTT  | G9CTGGCACA | TTGAT      |            | gggaca      | cccggtgtact | ca          |            |            | TGAC       | TGACAGATTG  | CTGTTGT     |             |             |            |            | t          | gggtattgcg | acaagca    | cgc     | agacacagag | caa        | [34] |      |
| [35]                            | -2.32 [35] |            |            | ACATGCC   | GCTATGTTT  | G          | A          | ATGTATGGAC | AGCGCCCT    |             | t           | caaacaccca | cattgtgtac |            | TGAC        | TGACAGATTG  | CTGTTGT     |             |            |            | t          | gggtattgcg | acaagca    | cgc     | agacacagag | caa        | [35] |      |
| [36]                            | -2.32 [36] |            |            | ACATGCC   | GCTATGTTT  | G          |            | ATGTATGGAC | AGCGCCCT    |             |             | caaacaccca | cattgtgtac | a          | TGAC        | TGACAGATTG  | CTGTTGT     |             |            |            | t          | gggtattgcg | acaagca    | cgc     | agacacagag | caa        | [36] |      |
| [37]                            | -2.32 [37] |            |            | ACATGCC   | GCTATGTTT  | G          |            | TGTATGGAC  | AGCGCCCT    |             |             | caaacaccca | cattgtgtac | aac        | TGAC        | TGACAGATTG  | CTGTTGT     |             |            |            | t          | gggtattgcg | acaagca    | cgc     | agacacagag | caa        | [37] |      |
| [38]                            | -2.01 [38] |            |            |           | [38]       | TG         | G9CTGGCACA | TTGAT      |             |             | CCCTGT      | G9GCACATGA | GT         |            | gtcac       | aaccacccgg  | ttaccGTGAC  | TGACAGATTG  | CTGTTGT    |            |            |            |            |         |            |            |      |      |
| [39]                            | -2.01 [39] |            |            |           |            |            |            |            |             |             | CCCTGT      | G9GCACATGA | GTG        |            | gtcac       | aaccacccgg  | ttaccGTGAC  | TGACAGATTG  | CTGTTGT    |            |            |            |            |         |            |            |      |      |
| [40]                            | -2.17      | TTG        | TTGTGACGG  | ACACATGCC | GCTATGTTT  | G9CT       | tgt        | tacataacgt | tccgggga    | T           | G9GCACATGA  | GTGTTGG9   |            |            |             |             | gctaac      | gaaacaaagca | gc         | tggttgcct  | ccaacgt    | [40]       |            |         |            |            |      |      |
| [41]                            | -2.27      | TG         | TTGTGACGG  | ACACATGCC | GCTATGTTT  | G9CTGG     | gt         | tacataacgt | tccgggga    |             | CATGA       | GTGTTGG9GT | GTAAACG    |            |             |             | aaacagca    | gccacagca   | tggttgcct  | ccaacgt    | [41]       |            |            |         |            |            |      |      |
| [42]                            | -2.33 [42] |            | GG         | ACACATGCC | GCTA       | GTTT       | G9CTGGCACA | TTGA       |             | gggaca      | cccggtgtact | ca         |            |            | GTGAC       | TGACAGATTG  | CTGTTG      |             |            |            |            | t          | gggtattgcg | acaagca | cgc        | agacacagag | caa  | [42] |
| [43]                            | -1.71 [43] |            | GG         | ACACATGCC | GCTATGTTT  | G9CTGGCACA | TTGA       |            | gggaca      | cccggtgtact | ca          |            |            | GTGAC      | TGACAGATTG  | CTGTTG      |             |             |            |            | t          | gggtattgcg | acaagca    | cgc     | agacacagag | caa        | [43] |      |
| [44]                            | -1.71 [44] |            | GG         | ACACATGCC | GCTATGTTT  | G9CTGGCACA | TTGAT      |            | gggaca      | cccggtgtact | ca          |            |            | GTGAC      | TGACAGATTG  | CTGTTG      |             |             |            |            | t          | gggtattgcg | acaagca    | cgc     | agacacagag | caa        | [44] |      |
| [45]                            | -1.71 [45] |            | G          | ACACATGCC | GCTATGTTT  | G9CTGGCACA | TTGA       |            | gggaca      | cccggtgtact | ca          |            |            | GTGAC      | TGACAGATTG  | CTGTTG      |             |             |            |            | t          | gggtattgcg | acaagca    | cgc     | agacacagag | caa        | [45] |      |
| [46]                            | -1.71 [46] |            | G          | ACACATGCC | GCTATGTTT  | G9CTGGCACA | TTGAT      |            | gggaca      | cccggtgtact | ca          |            |            | GTGAC      | TGACAGATTG  | CTGTTG      |             |             |            |            | t          | gggtattgcg | acaagca    | cgc     | agacacagag | caa        | [46] |      |
| [47]                            | -1.71 [47] |            |            | ACACATGCC | GCTATGTTT  | G9CTGGCACA | TTGAT      |            | gggaca      | cccggtgtact | ca          |            |            | GTGAC      | TGACAGATTG  | CTGTTG      |             |             |            |            | t          | gggtattgcg | acaagca    | cgc     | agacacagag | caa        | [47] |      |
| [48]                            | -2.32 [48] |            |            | ACATGCC   | GCTATGTTT  | G          | A          | ATGTATGGAC | AGCGCCCT    |             | t           | caaacaccca | cattgtgtac | a          | GTGAC       | TGACAGATTG  | CTGTTG      |             |            |            | t          | gggtattgcg | acaagca    | cgc     | agacacagag | caa        | [48] |      |
| [49]                            | -2.32 [49] |            |            | ACATGCC   | GCTATGTTT  | G          |            | ATGTATGGAC | AGCGCCCT    |             |             | caaacaccca | cattgtgtac | aa         | GTGAC       | TGACAGATTG  | CTGTTG      |             |            |            | t          | gggtattgcg | acaagca    | cgc     | agacacagag | caa        | [49] |      |
| [50]                            | -2.01 [50] |            |            |           | [50]       | TG         | G9CTGGCACA | TTGAT      |             |             | CCCTGT      | G9GCACATGA | GT         |            | gtcac       | aaccacccgg  | ttacc       | TGAC        | TGACAGATTG | CTGTTGT    |            |            |            |         |            |            |      |      |

## B

| Primer ID  | dG(dimer) | 11            | 21                    | 31        | 41                   | 51              | 61            | 71                   | 81         | 91                         | 101        | 111        | 121        | 131                        | 141                  | 151        | 161        | 171        | 181        | 191       | 201        | 211       | 221 |
|------------|-----------|---------------|-----------------------|-----------|----------------------|-----------------|---------------|----------------------|------------|----------------------------|------------|------------|------------|----------------------------|----------------------|------------|------------|------------|------------|-----------|------------|-----------|-----|
| [51]       | -2.01     |               | [51]                  |           | TTG G9CTGGCACA TTGAT |                 |               | CCTGT G9GCACATGA GTG |            | gtac aacacacggg ttacc TGAC | TGACAGATTG | CTGTTGTGCT | CGGGTCGCTG | CACCAACGGA                 | G9TG9CACGC           | CCACAG99CA | CCTAACGGC  | TGTCGTGGCG | TCTGTGCTG  | GTT       |            |           |     |
| [52]       | -2.17     | TTG TTGTGACGG | ACACATGCC             | GCTATGTTT | G9CT                 | tgt tacatacctg  | togcgga T     | G9GCACATGA           | GTGTTGGGG  |                            |            |            |            | gtacac gacacacgaa gcc      | tggttgccct ccaacgt   | [52]       |            |            |            |           |            |           |     |
| [53]       | -2.27     | TTG TTGTGACGG | ACACATG               | CC        | GCTATGTTT            | G9CTGG          | gt tacatacctg | togcgga T            | G9GCACATGA | GTGTTGGGG                  |            |            |            | aacagca gccacagaga         | tggttgccct ccaacgt   | [53]       |            |            |            |           |            |           |     |
| [54]       | -2.33     | [54]          | GG ACACATGCC          | GCTA      | GTGTT                | G9CTGGCACA TTGA |               |                      |            |                            |            |            |            | GTGAC                      | TGACAGATTG           | CTGTTGT    |            |            |            |           |            |           |     |
| [55]       | -2.09     | [55]          | GG ACACATGCC          | GCTATGTTT | G9CTGGCACA TTGA      |                 |               |                      |            |                            |            |            |            | GTGAC                      | TGACAGATTG           | CTGTTGT    |            |            |            |           |            |           |     |
| [56]       | -2.09     | [56]          | GG ACACATGCC          | GCTATGTTT | G9CTGGCACA TTGA      |                 |               |                      |            |                            |            |            |            | GTGAC                      | TGACAGATTG           | CTGTTGT    |            |            |            |           |            |           |     |
| [57]       | -1.71     | [57]          | G ACACATGCC           | GCTATGTTT | G9CTGGCACA TTGA      |                 |               |                      |            |                            |            |            |            | GTGAC                      | TGACAGATTG           | CTGTTGT    |            |            |            |           |            |           |     |
| [58]       | -1.71     | [58]          | G ACACATGCC           | GCTATGTTT | G9CTGGCACA TTGA      |                 |               |                      |            |                            |            |            |            | GTGAC                      | TGACAGATTG           | CTGTTGT    |            |            |            |           |            |           |     |
| [59]       | -1.71     | [59]          | ACACATGCC             | GCTATGTTT | G9CTGGCACA TTGA      |                 |               |                      |            |                            |            |            |            | GTGAC                      | TGACAGATTG           | CTGTTGT    |            |            |            |           |            |           |     |
| [60]       | -2.32     | [60]          | ACATGCC               | GCTATGTTT | G                    | A ATGTATGGAC    | AGCGCCCT      |                      |            |                            |            |            |            | GTGAC                      | TGACAGATTG           | CTGTTGT    |            |            |            |           |            |           |     |
| [61]       | -2.32     | [61]          | ACATGCC               | GCTATGTTT | G                    | ATGTATGGAC      | AGCGCCCT      |                      |            |                            |            |            |            | GTGAC                      | TGACAGATTG           | CTGTTGT    |            |            |            |           |            |           |     |
| [62]       | -2.01     | [62]          | TTG G9CTGGCACA TTGATC |           |                      |                 |               |                      |            |                            |            |            |            | gtac aacacacggg ttaccGTGAC | TGACAGATTG           | CTGTTGT    |            |            |            |           |            |           |     |
| [63]       | -2.01     | [63]          | TTG G9CTGGCACA TTGATC |           |                      |                 |               |                      |            |                            |            |            |            | gtac aacacacggg ttaccGTGAC | TGACAGATTG           | CTGTTGT    |            |            |            |           |            |           |     |
| [64]       | -1.71     | TTG TTGTGACGG | ACACATGCC             | GCTATGTTT | G9CT                 | tgt tacatacctg  | togcgga       | ACATGA               | GTGTTGGGGT | GTAACC                     |            |            |            | gtacac gacacacgaa gcc      | ac gtggttgccct ccaac | [64]       |            |            |            |           |            |           |     |
| [65]       | -2.27     | TTG TTGTGACGG | ACACATG               | CC        | GCTATGTTT            | G9CTGG          | gt tacatacctg | togcgga              | CATGA      | GTGTTGGGGT                 | GTAACC     |            |            | aacagca gccacagaga         | tggttgccct ccaacgt   | [65]       |            |            |            |           |            |           |     |
| [66]       | -2.33     | [66]          | GG ACACATGCC          | GCTA      | GTGTT                | G9CTGGCACA TTGA |               |                      |            |                            |            |            |            | GTGAC                      | TGACAGATTG           | CTGTTGT    |            |            |            |           |            |           |     |
| [67]       | -1.71     | [67]          | GG ACACATGCC          | GCTATGTTT | G9CTGGCACA TTGA      |                 |               |                      |            |                            |            |            |            | GTGAC                      | TGACAGATTG           | CTGTTGT    |            |            |            |           |            |           |     |
| [68]       | -1.71     | [68]          | GG ACACATGCC          | GCTATGTTT | G9CTGGCACA TTGA      |                 |               |                      |            |                            |            |            |            | GTGAC                      | TGACAGATTG           | CTGTTGT    |            |            |            |           |            |           |     |
| [69]       | -1.71     | [69]          | G ACACATGCC           | GCTATGTTT | G9CTGGCACA TTGA      |                 |               |                      |            |                            |            |            |            | GTGAC                      | TGACAGATTG           | CTGTTGT    |            |            |            |           |            |           |     |
| [70]       | -1.71     | [70]          | G ACACATGCC           | GCTATGTTT | G9CTGGCACA TTGA      |                 |               |                      |            |                            |            |            |            | GTGAC                      | TGACAGATTG           | CTGTTGT    |            |            |            |           |            |           |     |
| [71]       | -1.71     | [71]          | ACACATGCC             | GCTATGTTT | G9CTGGCACA TTGA      |                 |               |                      |            |                            |            |            |            | GTGAC                      | TGACAGATTG           | CTGTTGT    |            |            |            |           |            |           |     |
| [72]       | -2.32     | [72]          | ACATGCC               | GCTATGTTT | G                    | A ATGTATGGAC    | AGCGCCCT      |                      |            |                            |            |            |            | GTGAC                      | TGACAGATTG           | CTGTTGT    |            |            |            |           |            |           |     |
| [73]       | -2.32     | [73]          | ACATGCC               | GCTATGTTT | G                    | ATGTATGGAC      | AGCGCCCT      |                      |            |                            |            |            |            | GTGAC                      | TGACAGATTG           | CTGTTGT    |            |            |            |           |            |           |     |
| [74]       | -2.01     | [74]          | TTG G9CTGGCACA TTGATC |           |                      |                 |               |                      |            |                            |            |            |            | gtac aacacacggg ttacc      | TGAC                 | TGACAGATTG | CTGTTGT    |            |            |           |            |           |     |
| [75]       | -2.01     | [75]          | TTG G9CTGGCACA TTGATC |           |                      |                 |               |                      |            |                            |            |            |            | gtac aacacacggg ttacc      | TGAC                 | TGACAGATTG | CTGTTGT    |            |            |           |            |           |     |
| Target DNA | CTCCGTTTG | TTGTGACGG     | ACACATGCC             | GCTATGTTT | G9CTGGCACA           | TTGATCAACA      | ATGTATGGAC    | AGCGCCCTG            | G9GCACATGA | GTGTTGGGGT                 | GTAACCGATG | TTG9TG9CCC | AATGGGTGAC | TGACAGATTG                 | CTGTTGTGCT           | CGGGTCGCTG | CACCAACGGA | G9TG9CACGC | CCACAG99CA | CCTAACGGC | TGTCGTGGCG | TCTGTGCTG | GTT |
| Primer ID  | dG(dimer) | 11            | 21                    | 31        | 41                   | 51              | 61            | 71                   | 81         | 91                         | 101        | 111        | 121        | 131                        | 141                  | 151        | 161        | 171        | 181        | 191       | 201        | 211       | 221 |
| [76]       | -1.71     | TTG TTGTGACGG | ACACATGCC             | GCTATGTTT | G9CT                 | tgt tacatacctg  | togcgga       | ACATGA               | GTGTTGGGGT | GTAACC                     |            |            |            | gtacac gacacacgaa gcc      | ac gtggttgccct ccaac | [76]       |            |            |            |           |            |           |     |
| [77]       | -1.32     | [77]          | GG ACACATGCC          | GCTATGTTT | G9CTGGCACA TTGA      |                 |               |                      |            |                            |            |            |            | GTGAC                      | TGACAGATTG           | CTGTTGT    |            |            |            |           |            |           |     |
| [78]       | -1.32     | [78]          | GG ACACATGCC          | GCTATGTTT | G9CTGGCACA TTGA      |                 |               |                      |            |                            |            |            |            | GTGAC                      | TGACAGATTG           | CTGTTGT    |            |            |            |           |            |           |     |
| [79]       | -1.71     | [79]          | G ACACATGCC           | GCTATGTTT | G9CTGGCACA TTGA      |                 |               |                      |            |                            |            |            |            | GTGAC                      | TGACAGATTG           | CTGTTGT    |            |            |            |           |            |           |     |
| [80]       | -1.71     | [80]          | G ACACATGCC           | GCTATGTTT | G9CTGGCACA TTGA      |                 |               |                      |            |                            |            |            |            | GTGAC                      | TGACAGATTG           | CTGTTGT    |            |            |            |           |            |           |     |
| [81]       | -1.71     | [81]          | ACACATGCC             | GCTATGTTT | G9CTGGCACA TTGA      |                 |               |                      |            |                            |            |            |            | GTGAC                      | TGACAGATTG           | CTGTTGT    |            |            |            |           |            |           |     |
| [82]       | -2.32     | [82]          | ACATGCC               | GCTATGTTT | G                    | A ATGTATGGAC    | AGCGCCCT      |                      |            |                            |            |            |            | GTGAC                      | TGACAGATTG           | CTGTTGT    |            |            |            |           |            |           |     |
| [83]       | -2.32     | [83]          | ACATGCC               | GCTATGTTT | G                    | ATGTATGGAC      | AGCGCCCT      |                      |            |                            |            |            |            | GTGAC                      | TGACAGATTG           | CTGTTGT    |            |            |            |           |            |           |     |
| [84]       | -1.71     | TTG TTGTGACGG | ACACATGCC             | GCTATGTTT | G9CT                 | tgt tacatacctg  | togcgga       | ACATGA               | GTGTTGGGGT | GTAACC                     |            |            |            | gtacac gacacacgaa gcc      | ac gtggttgccct ccaac | [84]       |            |            |            |           |            |           |     |
| [85]       | -2.09     | [85]          | GG ACACATGCC          | GCTATGTTT | G9CTGGCACA TTGA      |                 |               |                      |            |                            |            |            |            | GTGAC                      | TGACAGATTG           | CTGTTGT    |            |            |            |           |            |           |     |
| [86]       | -2.09     | [86]          | GG ACACATGCC          | GCTATGTTT | G9CTGGCACA TTGA      |                 |               |                      |            |                            |            |            |            | GTGAC                      | TGACAGATTG           | CTGTTGT    |            |            |            |           |            |           |     |
| [87]       | -1.71     | [87]          | G ACACATGCC           | GCTATGTTT | G9CTGGCACA TTGA      |                 |               |                      |            |                            |            |            |            | GTGAC                      | TGACAGATTG           | CTGTTGT    |            |            |            |           |            |           |     |
| [88]       | -1.71     | [88]          | G ACACATGCC           | GCTATGTTT | G9CTGGCACA TTGA      |                 |               |                      |            |                            |            |            |            | GTGAC                      | TGACAGATTG           | CTGTTGT    |            |            |            |           |            |           |     |
| [89]       | -1.71     | [89]          | ACACATGCC             | GCTATGTTT | G9CTGGCACA TTGA      |                 |               |                      |            |                            |            |            |            | GTGAC                      | TGACAGATTG           | CTGTTGT    |            |            |            |           |            |           |     |
| [90]       | -2.32     | [90]          | ACATGCC               | GCTATGTTT | G                    | A ATGTATGGAC    | AGCGCCCT      |                      |            |                            |            |            |            | GTGAC                      | TGACAGATTG           | CTGTTGT    |            |            |            |           |            |           |     |
| [91]       | -2.32     | [91]          | ACATGCC               | GCTATGTTT | G                    | ATGTATGGAC      | AGCGCCCT      |                      |            |                            |            |            |            | GTGAC                      | TGACAGATTG           | CTGTTGT    |            |            |            |           |            |           |     |
| [92]       | -1.93     | TTG TTGTGACGG | ACACATGCC             | GCTATGTTT | G9CT                 | tgt tacatacctg  | togcgga       | ACATGA               | GTGTTGGGGT | GTAACC                     |            |            |            | gtacac gacacacgaa gcc      | tggttgccct ccaacgt   | [92]       |            |            |            |           |            |           |     |
| [93]       | -1.32     | [93]          | GG ACACATGCC          | GCTATGTTT | G9CTGGCACA TTGA      |                 |               |                      |            |                            |            |            |            | GTGAC                      | TGACAGATTG           | CTGTTGT    |            |            |            |           |            |           |     |
| [94]       | -1.32     | [94]          | GG ACACATGCC          | GCTATGTTT | G9CTGGCACA TTGA      |                 |               |                      |            |                            |            |            |            | GTGAC                      | TGACAGATTG           | CTGTTGT    |            |            |            |           |            |           |     |
| [95]       | -1.71     | [95]          | G ACACATGCC           | GCTATGTTT | G9CTGGCACA TTGA      |                 |               |                      |            |                            |            |            |            | GTGAC                      | TGACAGATTG           | CTGTTGT    |            |            |            |           |            |           |     |
| [96]       | -1.71     | [96]          | G ACACATGCC           | GCTATGTTT | G9CTGGCACA TTGA      |                 |               |                      |            |                            |            |            |            | GTGAC                      | TGACAGATTG           | CTGTTGT    |            |            |            |           |            |           |     |
| [97]       | -1.71     | [97]          | ACACATGCC             | GCTATGTTT | G9CTGGCACA TTGA      |                 |               |                      |            |                            |            |            |            | GTGAC                      | TGACAGATTG           | CTGTTGT    |            |            |            |           |            |           |     |
| [98]       | -2.32     | [98]          | ACATGCC               | GCTATGTTT | G                    | A ATGTATGGAC    | AGCGCCCT      |                      |            |                            |            |            |            | GTGAC                      | TGACAGATTG           | CTGTTGT    |            |            |            |           |            |           |     |
| [99]       | -2.32     | [99]          | ACATGCC               | GCTATGTTT | G                    | ATGTATGGAC      | AGCGCCCT      |                      |            |                            |            |            |            | GTGAC                      | TGACAGATTG           | CTGTTGT    |            |            |            |           |            |           |     |
| [100]      | -1.93     | TTG TTGTGACGG | ACACATGCC             | GCTATGTTT | G9CT                 | tgt tacatacctg  | togcgga       | ACATGA               | GTGTTGGGGT | GTAACC                     |            |            |            | gtacac gacacacgaa gcc      | tggttgccct ccaacgt   | [100]      |            |            |            |           |            |           |     |

[outputs: 228 sets] Displayed 1 - 100.

DesignId 191014234045

PrimerList191014234045
